# Supplementary material
Source: PubMed Central journal article supplement (PMC2799030)
Supplement: NIHMS154311-supplement-1.pdf [file NIHMS154311-supplement-1.pdf]

## **Supplementary Material & Methods**

**Protein detection.** Cell lysates were made in standard RIPA buffer at 20000 cells/ $\mu$ L and protein concentration were determined. For FANCD2 detection 50  $\mu$ g total protein was loaded for every sample on Nupage 3-8% Tris-Acetate gels (Invitrogen, Carlsbad, CA). Protein separation was performed by electrophoresis for 2<sup>1</sup>/<sub>2</sub> hours at 90 (V) and transfer to PVDF membrane (Millipore, Billarica, MA) at 25 (V) overnight. For MLH1 detection 30  $\mu$ g total protein was loaded for every sample on Nupage 4-12% Bis-Tris Gels, following standard overnight transfer. The following antibodies were used for protein detection Novus Biologicals NB100-182 polyclonal rabbit serum was used to detect human FANCD2 in a dilution of 1:1000. Detection of human and mouse MLH1 was performed with Santa Cruz SC-581 1:1000. All incubations were performed at 4<sup>o</sup> Celsius in TBST 0.1% Tween-20, 2% milk. Incubation with anti-mouse and -rabbit IgG HRP conjugated secondary antisera (Amersham, Piscataway, NJ) was followed by a standard chemo-luminescent detection.
